# Supplementary material for: Mapping of a novel clubroot disease resistance locus in Brassica napus and related functional identification
Source: Front Plant Sci. 2022 Sep 28;13:1014376. doi: 10.3389/fpls.2022.1014376 (PMC9554558; doi:10.3389/fpls.2022.1014376)
Supplement: Supplementary file 2 [file Table_1.xlsx]

## Sheet: Sheet1
Supplementary Table 1. Primers of A. thaliana Homozygous T-DNA insertion mutants
Name of primer	Sequence of primers (5'→3')
LBb1-pROK2	GCGTGGACCGCTTGCTGCAACT
LBb1.3-pROK2	ATTTTGCCGATTTCGGAAC
LBa1-pROK2	TGGTTCACGTAGTGGGCCATCG
salk_120989c-LP (PUB15)	GATCGGTACAAGCTCTTGTGC
salk_120989c-RP (PUB15)	CAGAGCTCTGGGTTTCAATTG
salk_126394c-LP (ATG8E)	TGGGCCTTTATCTCATGTCTC
salk_126394c-RP (ATG8E)	CAGGGTATTTCTCCCTGATCC
cs812600-LP (URM1)	GTTCCTCCTGCAAACATCAAC
cs812600-RP (URM1)	AAAGGCAGCCTCCTTGACTAC
salk_204550c-LP (WRKY12)	TTGAACATCGAACTCATTTGTTG
salk_204550c-RP (WRKY12)	TTCGTAAAAGCTGAGGTGAAAAC
salk_087049c-LP (ERF034)	ATCTTCCTCCTCCTCCATCAC
salk_087049c-RP (ERF034)	CACAAACACGATTTTGCTAGG
salk_042202-LP (SKP1)	TATTTTCCTCTTGCCCAATGC
salk_042202-RP (SKP1)	ACTCGCAATGGTGGTGATATC
salk_059908-LP (PME17)	AGCTGGGTTCTTAGAGCTTGG
salk_059908-RP (PME17)	CGACCCGGATCTTAGAGCTAC
salk_035853-LP (TCP9)	TGTGACCGGTTTAATCAAAGG
salk_035853-RP (TCP9)	TTCCTTCAACCTTCGTGTGAC

## Sheet: Sheet2
Supplementary Table 2. Sequences of SNP/InDel loci for genotyping
Marker name	Physical location	Sequence	Allelic Base
BnSNP986217	986217	AGCAAGTGAGTCTTCAAACACTGCACCAAGTGCAGGAGAAACAAAAGGGGCTCAAGCTAGTGAGCTTCCAAGCACTCCACCAAGTGCAGGAGAAGCAGAG(A/G)GGGATCAAGCCAGTGAGCATCCAAACGCTGTACCAAGTGCAGGAGAAGCAGAGAGGGATCAAGCCAGTGAGTCTCCAAACGCTGCAACAAGTGGAGGAGA	A/G
BnSNP1130952	1130952	TTGATTACGGGAGGGGGAAGGTTACTTACTCTATGAGGTTTCCAGCTCCTTTAATGTCCGTTGGGATCTCTCCGGATAGCTCTGTTCGTGTTGTTGGAGG(G/T)TCTAACGGTATGGTGTTTGCTGGGAAGAAGAAGAAGAAGGCGAGAGATGACGAGGAGAAGAAGAAAGCTAGCGTGACGAGTTTTTGGAGTGTGAAGAGTG	G/T
BnSNP2549534	2549534	AGTAGTAATAGAATTACAAGAGAAACAAAATAAAAACAAACTGGGGCTGGCCTGTTTTAATTTGTGCTCCGAAATATTACCTGACAAGACTTGGTCACGA(C/T)TGCCAAAACAGCTGATAATCCTTACTATACAACGAGCGGTCTTGTATCTCCAGGTTTGCTACATGCCGGTTTATGAGCTGCGACTGCATTATCTTACACA	C/T
BnSNP2806033	2806033	CAAATCACAAGAAAATATTAAAAACAAAGTCAACAAATCTCTCCGGTAAATCCAAATTAAGATATCACGGCTCAGCGCGCTCAATCCGGAGAGTCACCAT(T/G)GGAGACTTATTGAGGATCGTCACACGAGTCTCTCTCGAACATCTCCAAACATTCAAGTCATCTCCAGGGTTCCCTGTATCCACTCCATATTTATAAGGAA	T/G
BnSNP2942468	2942468	AAATAAGCGCAACCACTTCGTAAAAATAGACTAACTAAATATATCAAAGTAATCCATAATCATTTACTATATTTTATATGCATGATAATTATATAGAAAA(C/T)TTATATTATATATTTTGATGGACGAGAAAGAGAAATAGTTGTCTTAGACCACCCACAATAGGGTTTTCAATAGTTGAAACTCTCTTCAATGATGTTGTTG	C/T
BnInDel8030397	8030397	GAACATATAGACCATGTGATGATGTGAATCTGTGAACATATAGACCAATCTGTGAACATATAGACAACATATAGACCATGTGATGATGTGAATCTGTGAA(C/CATAT)ATATAGACTTTCTTCTTTTTAAATACACATTAAATATTAATGTTATCATTTGTTATTTAAAATATAAAATACGAGATTTCAACAATCAAGAAATAAAAAA	C/CATAT
BnInDel10749652	10749652	CCCCGTATATTGTCCAATGGTTGGTCAATTATATGTTAACACTTCATATATGAAGCAGATAGCCTAAAATCTTCAAGTACAAGTCTTTGCAGATCTCTTA(AT/A)TTTGCCGTATTCAAAGGTTCAACAAACTTAGACTTATAACCAGCAGCGACGCGATGTCGCTTTTCCTTTGAATCAGTCTATGGTTTTAATAGGACAACAA	AT/A
BnSNP11935447	11935447	CCGCGGCGGAGGAATACGGCTGGACGGCGGATGGATTGCCGGTGAGCGACGGCAGCGTGATCGGCGAGCCGATCGGGAGAAACCAGTGGAACTCCGGTCT(A/G)TTCTCCTGTTTCGGCCGAAACGATGAATTCTGCAGCAGCGATCTCGAAGTTTGTGAGTGTTTTCTTGTCTGCTTTCTATAATTAGGGTTTTGAAATTGGG	A/G
BnSNP12263642	12263642	CGTGGTGGGCCCATAACCCACAGGTCCCAGGATCGAAACCTGGCTCTGATATATTATGTTTTTTTTTTTTTTTTTTTTATTGACACAAAGCAGCTATAGA(C/T)AAAACTACAAACAATTAGTATCATTTATAAATCGATACACCACTGTAAAGGTCACTAATAAGAACAACAAAGTGATTTAAATGATGGGACAAAAAGAAAG	C/T
BnSNP12782114	12782114	ATATTAATTAGCTGCAAGATTATATGGGTCGATCGTGCCCTTTCTTTTCATGGTTTGTTGTTGCATTATTACAGTGGACAATAGATATGAGGTGTACCAT(T/A)TTTTCCGGTTAATAATAGCCCTTTATTTGTAAGAAAATATATGTGAATATAATCAATATATATGAAAGAAGATAACAAAATGAATATATTCGGAATTTAA	T/A
BnSNP13065120	13065120	AAAAAAAAGTTTAGTAAGATGACCTTTGTCTCGTAAGTGGCATATGTGCAAGTTGAAGTGCATAAAGCATATGGGCTCTTCAATTAATCAACATCAAATTA(G/C)CATCTAAATTACAAAAAGAATGAATATATCTCTTGGTCATGTGAATAGCATAAAAATGTTTATATTGTTATTGAAATTGAGATTAACCAAGAAATGTCCA	G/C
BnInDel13311700	13311700	ACTATATGAGAGACTCAAACCAATGTATAATCAAAGACTACACCAGTAAACTATAATAGCTGTACATATCTAATCACTAATGTATAACAGTTACCACACA(C/CA)AAAGGTAGCTACTTTACACTAAATGCAGAATCTACACAATCAATACCACTAAAGATTCGATTTTTATTTACCTCCAAATCAATAGAAAGCGTCTCAGCAA	C/CA
BnSNP13869912	13869912	ATCTGGTTGAACCGGTTAGACCGGTCCGACCATTGACCCAGTTATAATGTCAAGTCAATGTCCAGTCTAGTTTGACTCAAACCACTAGACCAAGAGGGTT(C/T)CATAATTTTATCAGATTTTTTAACGCTGATTTTTTATGATCTTATAATTATGATATGAAAAAGATACGAGACTTGAAACGTAGTTTTCGTATCAGTCCTC	C/T
BnSNP14198336	14198336	TCTTCGGCGTCACGCCGGGGCAGTTACCGGCGACGGCTTCCGCGACTTCCTCCCAGTGATTCGCCTTGAGGTTCCCGCGGTTGAGCGCGTGCCATTTGTC(A/G)CGGTAGCCGTCGATGAGCGCGATCGTCTCCTCCAGAGACCAGCACGGCGGAGGCAAGCGCCTAGAGTTCTTGGTCGCCACCGCCGCGGGGGTGGAGGCGA	A/G
BnSNP14462201	14462201	TCAGTGACTGGTGAAGAACCAATCTCTCTCTCCTATCTGCTCATATAACCAACCAAAACTGTGCCAAGACATTGAATTCACCAATTGTGTCCTGAAGATT(A/G)ATCTTCACATCCAAACCATACCCTATCAGTTCAACTCAAAATTACGATAGAAGTAAAGATGATATGATGCCAAAGAAGAGATATCATACCTATATGCTGT	A/G
BnSNP41138008	41138008	TGGGTACAGTTGAAATGTGTATGATACAAGGAAAGTACGTAGTACTTTACCCAAATAAAGCCAAATACTCATGTTGTCAACTTCAGATAGGCAAAATCAG(A/C)TGTTACTATTTATTGTACAGACGAACTATTCCATATGGTATAAAACAATATCATAGCTAGAGTTGCGTGGAAGTTAGAAAGTACGGTACATGGGGTTGGA	A/C
BnSNP42038255	42038255	GCTCCTCGCCGGAAGAGCGGCGGCGGCGGAGAGAGAGGAGCGTAAGCCCAAGCCCGCGCTACGGGAAACTGGCGAGAGGATTCTCGAAACCAACATCAGG(G/T)AATGCAGAGGGAAACAAGCTGAGATAAAAAAGGAGAAAGAGTTTATAATCCAAATCGAATTTTTGAGGTAAATGGTTATTTCTAGAGCGCACACAGACGT	G/T
BnSNP42576658	42576658	ATCAGGTGGTGAGTGATCCGAGCTTGACGAAGTCAGGGGTGTACTGGAGCTGGAACAAGGCTTCGGCGTCTTTCGAGAACGAGTTATCAGAAGAAGCAAG(C/T)GATGTTGAGAAGGCTCGTAAAGTGTGGGAGATCAGTGAGAAGCTCGTTGGGTTGGCTTAAATGACACTTGGAATCTCTTCTTTCTGATGAGATCACGTTG	C/T
BnSNP42994750	42994750	CTTCCGGTCCAAGCTCTAGAGAAGAAGAAGTTCCACCAGTGCCACAACCACTTGAACCCATCAACAAATAAGCATTTGCTACATGCAAAAGGGTTTACAA(T/C)CTTGGTGTTGTCAGTTTCCTTCCATCATAGTCATATATTTGTTCTATCTCTCAAGATAAGATATATAATGTATAATAAAGAATCAAGAGCATTTGCTTAT	T/C
BnSNP43129203	43129203	AAAATATAGTCGCTAACTTACGGAAAAGAGTAATCACAAATTTCTTCAAGCTGTCATCGTCTTAGGGTTTTGCCTCGTGAAGATGCCAAAAACAACCGAA(C/T)ATTGCGATGAAAAAATTGAAGAGATACTTTGTGAAGACCGGATTAGTTCTTTACCCGACGATTTGCTTGTGACGATACTGTTGTCTGTCCCTCTTAAAGA	C/T

## Sheet: Sheet3
Supplementary Table 3. Primers of SNP Genotyping
Name of primer	Sequence of primers (5'→3')
1-BnSNP986217-F	CAGCCATTCTCCAAGGTCATTT
1-BnSNP986217-R	CCCTTCTGCTTCTCCTCCACTT
2-BnSNP1130952-F	GGTGACGTGTCTCTCCGTTG
2-BnSNP1130952-R	ACCTGAAGTAACTCGGCCTC
3-BnSNP2549534-F	CTCCTTGACCAACGAGACCAA
3-BnSNP2549534-R	AGTGGGACTGGTCGTGTGTA
4-BnSNP2806033-F	ACTTCTGCTTCAAATCACAAGAAAA
4-BnSNP2806033-R	GATGAGGAAGCTGGCGAATG
5-BnSNP2942468-F	ATAAATAAGCGCAACCACTTCGTA
5-BnSNP2942468-R	TCAACAACATCATTGAAGAGAGTTTC
6-BnInDel8030397-F	TCTTTTTGCCATCTGATGCATGT
6-BnInDel8030397-R	TGTGAGCCTAATCAGAGTATTCCA
7-BnInDel10749652-F	ACATGAATTGTTTAGCCCCGC
7-BnInDel10749652-R	ACCGCACACTAGATGATGGAG
8-BnSNP11935447-F	CAAGGCAACGACCCCAAGAT
8-BnSNP11935447-R	TCAATTTCGATCGACCCATTTCA
9-BnSNP12263642-F	GATGTTCGGTCTGGAGTCAGG
9-BnSNP12263642-R	GCTGATTAGGAATCTCACGGGTT
10-BnSNP12782114-F	TTCTTAAAGGCAATGTCCTCTCACT
10-BnSNP12782114-R	TTTCTGAGTCGGGTGGTCTT
11-BnSNP13065120-F	GTTGACAGCGCATAGTCGGTT
11-BnSNP13065120-R	CGTTACCTCCTCCCACTTTGAC
12-BnInDel13311700-F	GACTCAAACCAATGTATAATCAAAGACTA
12-BnInDel13311700-R	AACATCGAAGGCATGATCCTATT
13-BnSNP13869912-F	GCTGCCCCCACTAATTTCAG
13-BnSNP13869912-R	AAGGCCATTCATTGCCTATGTT
14-BnSNP14198336-F	CCATGGCTTCCATCCGCTTA
14-BnSNP14198336-R	GTGCGTAACAAATCGCCTCC
15-BnSNP14462201-F	CAAATAAAAGGATCAATCATTACAAAGT
15-BnSNP14462201-R	TGATATCTCTTCTTTGGCATCATATC
16-BnSNP41138008-F	ACAAACGGCGAATTGACAACG
16-BnSNP41138008-R	CTCCTCATCCAACCCCATGT
17-BnSNP42038255-F	AAGTCGTGAACGAGGGACGA
17-BnSNP42038255-R	CACGTCTGTGTGCGCTCTA
18-BnSNP42576658-F	GCTGTGTACTCAATCAGTGGAGTT
18-BnSNP42576658-R	GCTTGTTGCTGGCCAACTTTTA
19-BnSNP42994750-F	CTAGTAGTTTTGCCCCGCAC
19-BnSNP42994750-R	TGTGGCGAACGTTCTTTGTTTT
20-BnSNP43129203-F	GGGGTGGGCTTTTAATTTCCG
20-BnSNP43129203-R	TGGTGGCTGCTGCATCTTTA
A-1-SNP-F	TTTTTTTTTTCAAGTGCAGGAGAAGCAGAG
A-2-SNP-F	TTTTTTTTTTTTTTTTCTGTTCGTGTTGTTGGAGG
A-3-SNP-F	TTTTTTTTTTTTTTTTTTTTCTGACAAGACTTGGTCACGA
A-4-SNP-F	TTTTTTTTTTTTTTTTTTTTTTTTTTCAATCCGGAGAGTCACCAT
A-5-SNP-F	TTTTTTTTTTTTTTTTTTTTTTTTATATGCATGATAATTATATAGAAAA
A-6-InDel-F	TTTTTTTTTTTTTTTTTTTTTTTTTTTTTTTTTTTTGTGATGATGTGAATCTGTGAA
A-7-InDel-F	TTTTTTTTTTTTTTTTTTTTTTTTTTTTAGTACAAGTCTTTGCAGATCTCTTA
B-8-SNP-F	TTTTTTTTTTTTCCAGTGGAACTCCGGTCT
B-9-SNP-R	TTTTTTTATAAATGATACTAATTGTTTGTAGTTTT
B-10-SNP-F	TTTTTTTTTTTTTTTGGACAATAGATATGAGGTGTACCAT
B-11-SNP-F	TTTTTTTTTTTTTTTTTTTTTCTTCAATTAATCAACATCAAATTA
B-12-InDel-F	TTTTTTTTTTTTTTTTTTTTTTTCACTAATGTATAACAGTTACCACACA
B-13-SNP-F	TTTTTTTTTTTTTTTTTTTTTTTTTTTTTTTAAACCACTAGACCAAGAGGGTT
B-14-SNP-F	TTTTTTTTTTTTTTTTTTTTTTTTTTTTTTTTTTTTTTTTTGCGCGTGCCATTTGTC
C-15-SNP-F	TTTTTTTTCACCAATTGTGTCCTGAAGATT
C-16-SNP-F	TTTTTTTTTTTTTTTTTCAACTTCAGATAGGCAAAATCAG
C-17-SNP-F	TTTTTTTTTTTTTTTTTTTTTTTTTTTTATTCTCGAAACCAACATCAGG
C-18-SNP-F	TTTTTTTTTTTTAACGAGTTATCAGAAGAAGCAAG
C-19-SNP-F	TTTTTTTTTTTTTTTTTTTTTTTCTACATGCAAAAGGGTTTACAA
C-20-SNP-F	TTTTTTTTTTTTTTTTTTTTTTTTTTTTTTTTTTGATGCCAAAAACAACCGAA

## Sheet: Sheet4
Supplementary Table 4. Primers of qRT and Vectors Construction
Name of primer	Sequence of primers (5'→3')
qRT-PME17-F	GTGCAGCCAAACTCCAAAC
qRT-PME17-R	TGGGATTTGGCGAGGATGG
qRT-ATG8E-F	ACCTTGTGCCATCAGACC
qRT-ATG8E-R	CGCTTGACATGATCTCTCC
qRT-SKP1-F	TACTTGTCGCACGCTTGC
qRT-SKP1-R	AGTCGAATCCCTGGATCATC
qRT-WRKY12-F	GCCTTCACCCCAGATGTG
qRT-WRKY12-R	TGTGGTTGTGACGACCTTC
qRT-TCP9-F	CGTCTAAGAGCCGTTGATC
qRT-TCP9-R	TGGTGTGACGGTCTTTAGTA
qRT-PUB15-F	TATGACAGCCACTTCGCTT
qRT-PUB15-R	CCGATGAAAACGACAATATCTG
qRT-ERF034-F	CACCGTGTCTTCCTCCTAT
qRT-ERF034-R	CGTTACCATCATCTTCTAGAAT
qRT-PUB15 (2)-F	AGTCCATGTTCTTGAGTCAG
qRT-PUB15 (2)-R	CTCCATTCTCTTTCACCTCC
qRT-URM1-F	TCATCAAGGGAGATACTGTGAG
qRT-URM1-R	GATGAAAACGATGACATCTTTG
qRT-URM1-(all)-R	CAAGGTCGAGATGAAAACG
BnACTIN-F	TCTTCCTCACGCTATCCTCCG
BnACTIN-R	AGCCGTCTCCAGCTCTTGC
AtACTIN2-F	TTGACTACGAGCAGGAGATGG
AtACTIN2-R	ACAAACGAGGGCTGGAACAAG
121-TCP9-BamHI-F	CGGGATCCATGGCGACAATTAAGAAGCAC
121-TCP9-KpnI-R	GGGGTACCGTGGTTCGACGACCGTGG
121-ERF034-BamHI-F	CGGGATCCATGGGAACCATAGAGAAGAG
121-ERF034-KpnI-R	GGGGTACCGTCATTGAGACAGAAAAACG
ERF034-EcoRI-F	CGGAATTCATGGGAACCATAGAGAAGAG
ERF034-BamHI-R	CGGGATCCTTAGTCATTGAGACAGAAAAACG
TCP9-EcoRI-F	CGGAATTCATGGCGACAATTAAGAAGCAC
TCP9-BamHI-R	CGGGATCCTCAGTGGTTCGACGACCG
PUB15-EcoRI-F	CGGAATTCATGGTGGAGGAGAAGAAAC
PUB15-BamHI-R	CGGGATCCCTACTTCCTACTAAAGAAAC
TCP9-NcoI-F	CATGCCATGGCGACAATTAAGAAGCAC
TCP9-XbaI-R	GCTCTAGATCAGTGGTTCGACGACCG
ERF034-NcoI-F	CATGCCATGGGAACCATAGAGAAGAG
ERF034-XmaI-R	CCCCCGGGTTAGTCATTGAGACAGAAAAACG
ATG8E-NcoI-F	CATGCCATGGACAAAGGCAGCAGC
ATG8E-XbaI-R	GCTCTAGATCAGATTGAAGAAGCACCAAAC
PUB15-NcoI-F	CATGCCATGGTGGAGGAGAAGAAAC
PUB15-XbaI-R	GCTCTAGACTACTTCCTACTAAAGAAAC

## Sheet: Sheet5
Supplementary Table 5. Summary of sequencing data quality
Sample	Raw bases (bp)	Clean bases (bp)	Effective rate (%)	Error rate (%)	Q20 (%)	Q30 (%)	GC content (%)
R_F2	25521831000	25492011300	99.88	0.03	96.75	91.34	37.78
Kc84R	13317282600	13298191200	99.86	0.03	96.84	91.64	38.8
855S	13233702000	13216500900	99.87	0.03	96.81	91.5	38.47
S_F2	24151904400	24120943800	99.87	0.03	96.9	91.75	38.31
Supplementary Table 6. The depth and coverage statistics of sequencing data
Sample	Mapped reads	Total reads	Mapping rate (%)	Average depth (×)	Coverage 1× (%)	Coverage 4× (%)
Kc84R	86860220	88654608	97.98	12.94	90.9	78.2
855S	86484943	88110006	98.16	12.78	92.5	80.58
R_F2	166683593	169946742	98.08	23.59	96.06	92.09
S_F2	158013861	160806292	98.26	22.36	96.2	91.53
Supplementary Table 7. Statistics of SNP and InDel detection and annotation results
Category		Number of SNPs	Number of InDels
Upstream		156494	83510
Exonic	Stop gain	1502	276
	Stop loss	395	37
	Synonymous	225348
	Non-synonymous	139868
	Frameshift deletion		3519
	Frameshift insertion		2776
	Non-frameshift deletion		6973
	Non-frameshift insertion		6143
Intronic		251358	139564
Splicing		737	1661
Downstream		135121	59949
upstream/downstream		30999	19545
Intergenic		1030260	306011
ts		1187127
tv		879570
ts/tv		1.349
Insertion			329719
Deletion			361410
Total		2066697	691129

## Sheet: Sheet6
Supplementary Table 8. Summary of SNP/InDel events of candidate genes
Gene ID	No. of variants
	SNP	InDel	Total
LOC106438228	10	11	21
LOC106443641	27	11	38
LOC106443642	17	21	38
LOC106441903	22	8	30
LOC106438229	2	3	5
LOC106438230	16	10	26
LOC106438231	4	3	7
LOC106441904	0	0	0
LOC106438232	9	0	9
LOC106438234	10	3	13
LOC106443643	12	7	19
LOC106443644	1	7	8
LOC106438235	29	16	45
LOC106438238	7	7	14
LOC106438239	2	1	3
LOC106438240	1	0	1
LOC106438237	0	0	0
LOC106438236	5	0	5
LOC106438243	4	3	7
LOC106438242	1	3	4
LOC106438241	4	8	12
LOC106438245	6	6	12
LOC106443645	3	7	10
LOC106438246	3	7	10
LOC106438247	15	8	23
LOC106438248	5	7	12
LOC106438249	11	3	14
BNAA03G56780D	7	4	11
LOC106438251	4	2	6
LOC106441905	16	4	20
LOC106443646	10	7	17
LOC106438252	3	3	6
LOC106441906	13	12	25
LOC106443647	7	9	16
LOC106438253	3	4	7
LOC106441907	10	3	13
LOC106441908	0	0	0
LOC111214396	0	0	0
LOC106438255	3	8	11
LOC106438256	18	5	23
LOC106438257	7	8	15
LOC106443648	9	3	12
LOC106443650	5	6	11
LOC106438258	68	3	71
LOC106438259	31	17	48
LOC106443651	3	1	4
LOC106438263	9	12	21
LOC106438262	17	9	26
LOC106438264	4	1	5
LOC106443652	7	11	18
LOC106438265	41	14	55

## Sheet: Sheet7
Supplementary Table 9. Functional annotation of the predicted interacting proteins of AtERF034
ID in A. thaliana	Score	Name	Funtions Annotation
AT1G13270.1	0.53	MAP1C	Methionine aminopeptidase 1B
AT2G28550.3	0.609	RAP2.7	Ethylene-responsive transcription factor RAP2-7.
AT2G42430.1	0.463	LBD16	Lateral organ boundaries-domain 16; Transcriptional activator.
AT2G45240.1	0.533	MAP1A	Methionine aminopeptidase 1A;
AT3G50340.1	0.619	AT3G50340	Uncharacterized protein At3g50340; Unknown protein
AT4G17350.1	0.569	AT4G17350	Protein of unknown function DUF828
AT4G25410.1	0.551	AT4G25410	Basic bHLH DNA-binding protein; Expressed in root.
AT4G37040.1	0.533	MAP1D	Methionine aminopeptidase 1D
AT5G60120.2	0.541	TOE2	AP2-like ethylene-responsive transcription factor TOE2
AT5G60200.1	0.552	TMO6	Dof zinc finger protein DOF5.3; Transcription factor.
Supplementary Table 10. Functional annotation of the predicted interacting proteins of BrERF034
ID in B. rapa	Homologous Sequence in A. thaliana	Score	Annotation
Bra000487.1-P	AT2G28550	0.599	RAP2.7, TOE1, transcription factor.
Bra000990.1-P	AT3G01750	0.473	Serine/threonine-protein phosphatase 6 regulatory ankyrin repeat subunit b
Bra004893.1-P		0.507	Methionine aminopeptidase 1a
Bra009515.1-P	AT5G03720	0.533	Heat shock transcription factor, transcription factor.
Bra011733.1-P		0.507	Methionine aminopeptidase 1d
Bra013113.1-P	AT2G15020	0.535	Uncharacterized protein, loc103860415.
Bra013248.1-P	AT3G24650	0.573	ABI3 (ABA INSENSITIVE 3)
Bra020262.1-P	AT5G60120	0.592	TOE2
Bra025159.1-P	AT3G25740	0.507	Methionine aminopeptidase
Bra026916.1-P		0.493	Methionine aminopeptidase 1b
